# Supplementary material
Source: PubMed Central journal article supplement (PMC9263810)
Supplement: mmc1.pdf [file mmc1.pdf]

**Supplemental information**

**The generation of stem cell-like memory cells  
early after BNT162b2 vaccination is associated  
with durability of memory CD8<sup>+</sup> T cell responses**

**Sungmin Jung, Jae Hyung Jung, Ji Yun Noh, Woo-Joong Kim, Soo-Young Yoon, Jongtak Jung, Eu Suk Kim, Hong Bin Kim, Hee Jin Cheong, Woo Joo Kim, Su-Hyung Park, Kyoung-Ho Song, Joon Young Song, and Eui-Cheol Shin**

**Table S1. Characteristics of the BNT162b2-vaccinated individuals with SARS-CoV-2 MHC class I multimer<sup>+</sup>CD8<sup>+</sup> T cells, Related to Figures 1-4.**

| Donor number | Donor characteristics |          |          | Multimer                             | Time points (days post-vaccination) |            |         |             |         |          |          |
|--------------|-----------------------|----------|----------|--------------------------------------|-------------------------------------|------------|---------|-------------|---------|----------|----------|
|              | Sex                   | Age (yr) | HLA type |                                      | Pre-vaccination                     | Post-first |         | Post-second |         |          |          |
|              |                       |          |          |                                      | 0                                   | 1 week     | 3 weeks | 1-2 weeks   | 3 weeks | 12 weeks | 24 weeks |
| 7            | M                     | 44       | HLA-A*02 | S <sub>269</sub> , S <sub>1000</sub> | 0                                   | 7          | 18      | 7           | 21      | 84       | 168      |
| 15           | F                     | 30       | HLA-A*02 | S <sub>269</sub>                     | 0                                   | 9          | 20      | 8           | 22      | 87       | 170      |
| 16           | F                     | 28       | HLA-A*02 | S <sub>269</sub> , S <sub>1000</sub> | 0                                   | 8          | 19      | 8           | 21      | 86       | 169      |
| 21           | M                     | 34       | HLA-A*02 | S <sub>269</sub>                     | 0                                   | 8          | 19      | 8           | 21      | 86       | 173      |
| 22           | M                     | 34       | HLA-A*02 | S <sub>269</sub>                     | 0                                   | 7          | 20      | 7           | 25      | 85       | 168      |
| 24           | F                     | 24       | HLA-A*02 | S <sub>269</sub>                     | 0                                   | 9          | 20      | 8           | 22      | 84       | 170      |
| 28           | F                     | 38       | HLA-A*02 | S <sub>269</sub>                     | 0                                   | 8          | 19      | 8           | 21      | 84       | 168      |
| 30           | F                     | 56       | HLA-A*02 | S <sub>269</sub>                     | 0                                   | 9          | 20      | 8           | 22      | 84       | 170      |
| 32           | F                     | 29       | HLA-A*02 | S <sub>269</sub>                     | 0                                   | 8          | 19      | 8           | 21      | 84       | 166      |
| 33           | F                     | 35       | HLA-A*02 | S <sub>269</sub> , S <sub>1000</sub> | 0                                   | 8          | 19      | 8           | 21      | 86       | 169      |
| 45           | F                     | 28       | HLA-A*02 | S <sub>269</sub>                     | 0                                   | 7          | 18      | 11          | 21      | 86       | 169      |
| 78           | F                     | 27       | HLA-A*02 | S <sub>269</sub>                     | 0                                   | 7          | 21      | 8           | 21      | 84       | 169      |

Yr, year; M, male; F, female.

**Table S2. Characteristics of the BNT162b2-vaccinated individuals with SARS-CoV-2 MHC class I multimer<sup>+</sup>CD8<sup>+</sup> T cells, Related to Figure 4.**

| Donor number | Donor characteristics |          |          | Multimer         | Time points (days post-vaccination) |            |         |             |         |          |          |
|--------------|-----------------------|----------|----------|------------------|-------------------------------------|------------|---------|-------------|---------|----------|----------|
|              | Sex                   | Age (yr) | HLA type |                  | Pre-vaccination                     | Post-first |         | Post-second |         |          |          |
|              |                       |          |          |                  | 0                                   | 1 week     | 3 weeks | 1-2 weeks   | 3 weeks | 12 weeks | 24 weeks |
| 20           | F                     | 42       | HLA-A*24 | S <sub>448</sub> | 0                                   | NA         | NA      | 7           | NA      | NA       | 164      |
| 25           | F                     | 25       | HLA-A*24 | S <sub>448</sub> | 0                                   | NA         | NA      | 8           | NA      | NA       | 170      |
| BH67         | F                     | 26       | HLA-A*02 | S <sub>269</sub> | 0                                   | NA         | NA      | 15          | NA      | NA       | 154      |
| BH68         | F                     | 26       | HLA-A*02 | S <sub>269</sub> | 0                                   | NA         | NA      | 13          | NA      | NA       | 154      |
| BH70         | F                     | 31       | HLA-A*02 | S <sub>269</sub> | 0                                   | NA         | NA      | 13          | NA      | NA       | 153      |
| BH71         | F                     | 33       | HLA-A*02 | S <sub>269</sub> | 0                                   | NA         | NA      | 14          | NA      | NA       | 155      |
| BH72         | F                     | 30       | HLA-A*02 | S <sub>269</sub> | 0                                   | NA         | NA      | 13          | NA      | NA       | 153      |
| BH73         | F                     | 27       | HLA-A*02 | S <sub>269</sub> | 0                                   | NA         | NA      | 14          | NA      | NA       | 159      |
| BH78         | F                     | 28       | HLA-A*02 | S <sub>269</sub> | 0                                   | NA         | NA      | 13          | NA      | NA       | 152      |
| BH82         | F                     | 26       | HLA-A*02 | S <sub>269</sub> | 0                                   | NA         | NA      | 14          | NA      | NA       | 157      |

Yr, year; M, male; F, female.



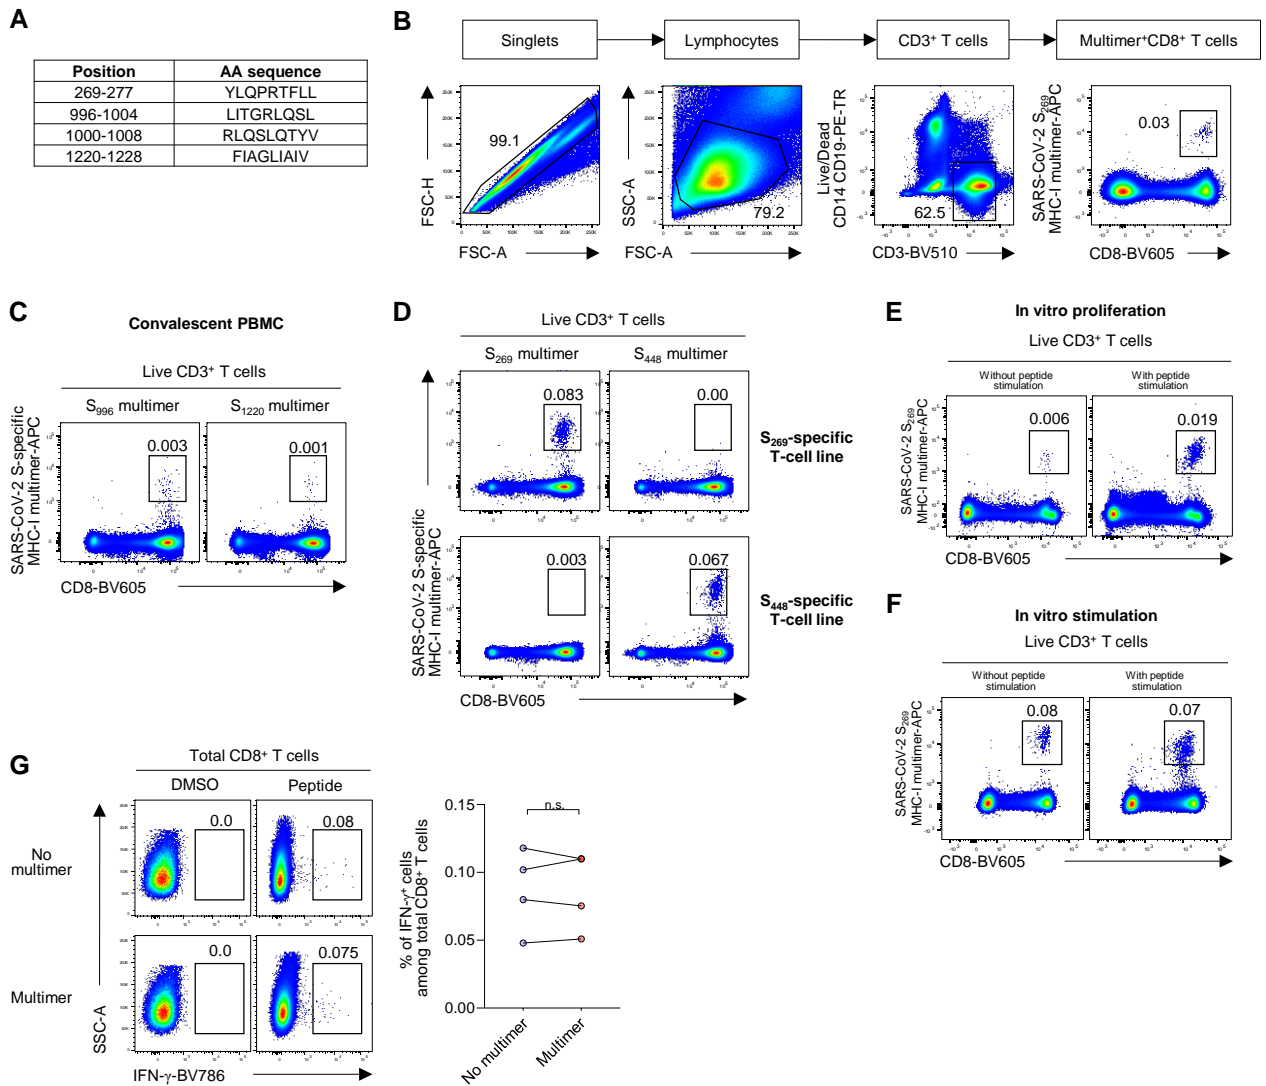

**Figure S1. Detection of SARS-CoV-2 S-specific multimer<sup>+</sup>CD8<sup>+</sup> T cells and validation, Related to Figure 1.**

(A) Characteristics of SARS-CoV-2 S-specific MHC-I multimers utilized in this study.

(B) Gating strategy used for the detection of SARS-CoV-2 S-specific multimer<sup>+</sup>CD8<sup>+</sup> T cells.

(C) S<sub>996</sub> and S<sub>1220</sub>-specific T-cell lines were generated by stimulating PBMCs from HLA-A\*02(+) donors who recovered from SARS-CoV-2 infection with S<sub>996</sub> (LITGRLQSL) or S<sub>1220</sub> (FIAGLIAIV) peptides and recombinant human IL-2 (200 U/mL) for 2 weeks. Examples of S<sub>996</sub> or S<sub>1220</sub> multimer staining are presented.

(D) S<sub>269</sub>-specific and S<sub>448</sub>-specific T-cell lines were generated by stimulating PBMCs from HLA-A\*02(+/-)24(-) and HLA-A\*02(-/+)24(+) BNT162b2-vaccinated individuals with S<sub>269</sub> (YLQPRTFLL) and S<sub>448</sub> (NYNYLYRLF) peptides and recombinant human IL-2 (200 U/mL), respectively, for 2 weeks. The generated T cells were successfully stained with the corresponding multimer: HLA-A\*0201 S<sub>269</sub> or HLA-A\*2402 S<sub>448</sub>. However, multimer<sup>+</sup> cells were not detected in HLA-mismatched cross-staining.

(E-F) Representative flow cytometry plots showing S<sub>269</sub> multimer<sup>+</sup> cells after S<sub>269</sub> peptide stimulation of CTV-labeled PBMCs for (E) 120 h or (F) 6 h.

(G) Validation of MHC-I multimer-combined IFN- $\gamma$  intracellular staining (ICS). IFN- $\gamma$  ICS was performed with or without S<sub>269</sub> multimer staining using PBMCs from BNT162b2-vaccinated individuals (n=4; PBMCs obtained 6 months post-second vaccination). Left: Representative flow cytometry plots showing PBMCs from one individual. Right: Summary graph showing the frequency of IFN- $\gamma$ <sup>+</sup> cells among CD8<sup>+</sup> T cells. Statistical analysis was performed using paired Wilcoxon signed rank test (n.s., not significant).

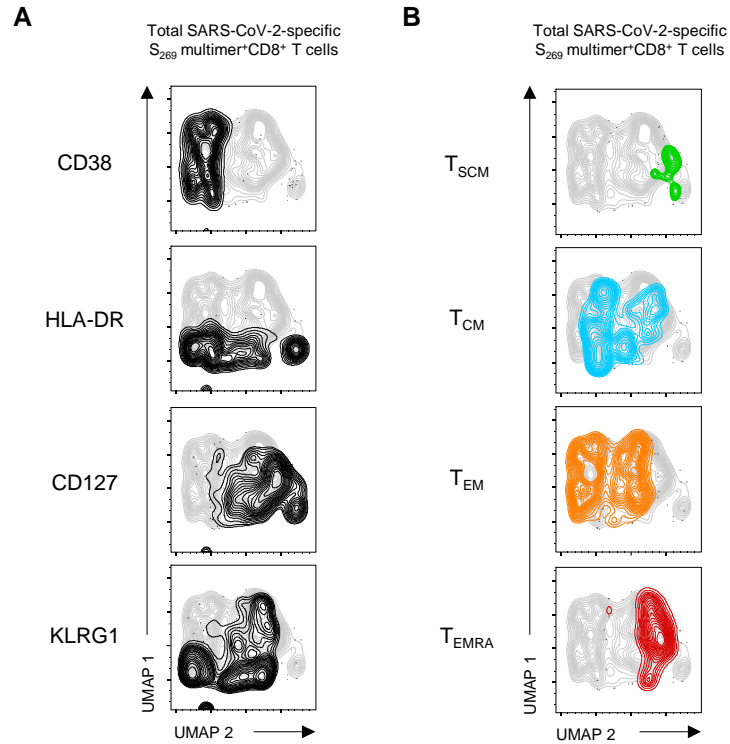

**Figure S2. UMAP plot of  $S_{269}$  multimer<sup>+</sup>CD8<sup>+</sup> T cells in BNT162b2-vaccinated individuals over time, Related to Figure 2.**

Pooled  $S_{269}$  multimer<sup>+</sup>CD8<sup>+</sup> T cells from multiple patients. (A) Multimer<sup>+</sup> cells expressing the indicated markers. (B) Multimer<sup>+</sup> cells exhibiting each memory subset. Each time point consists of 4-5 patients with a total of 650-750 cells.

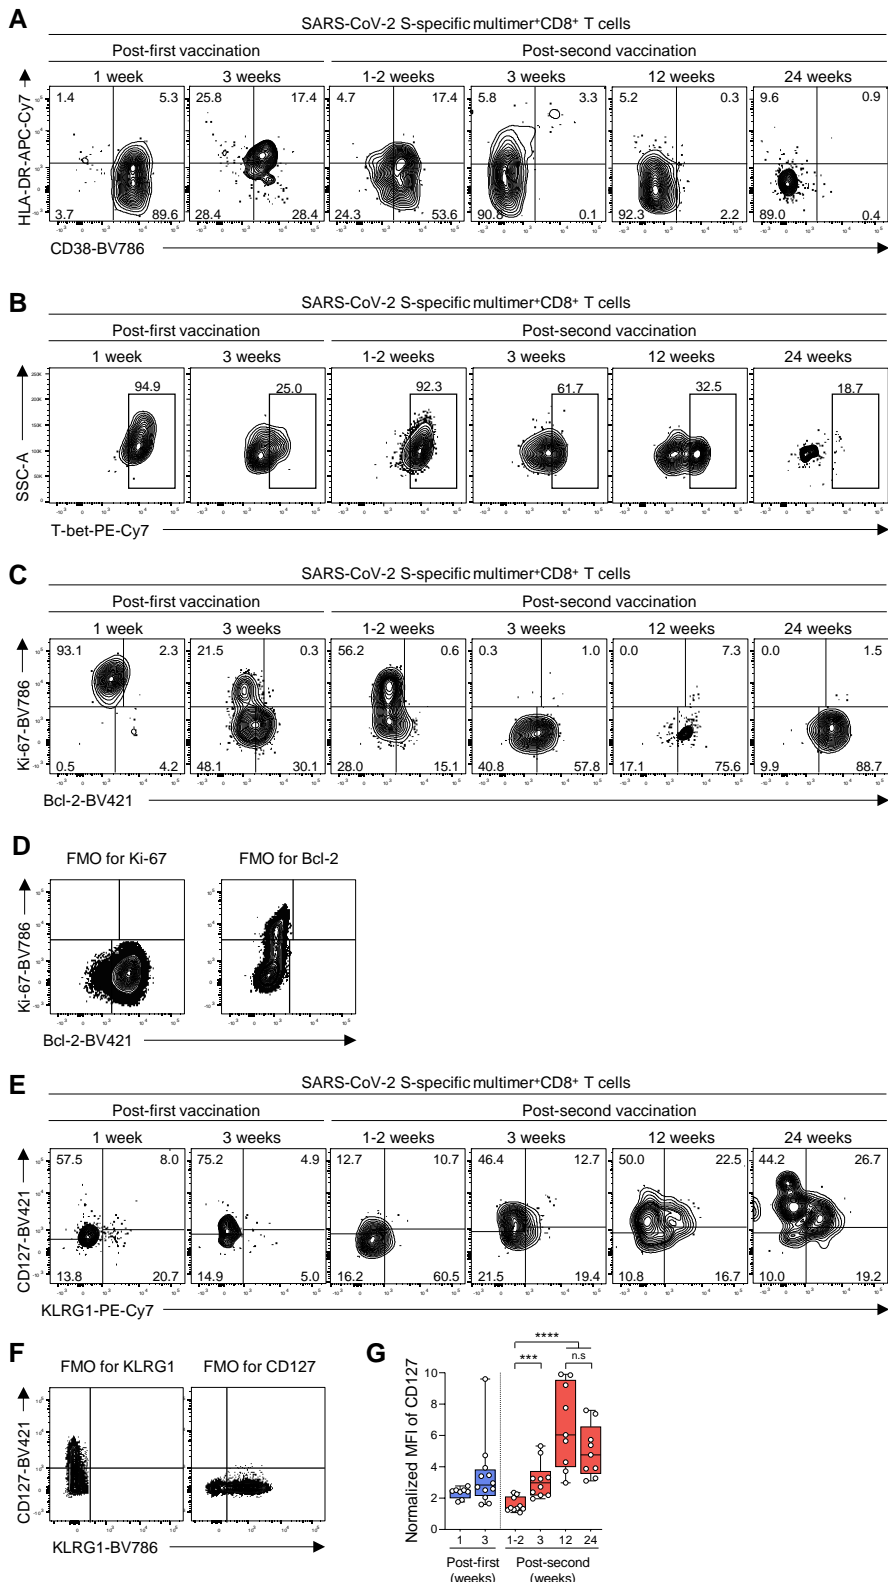

**Figure S3. Phenotypes of S<sub>269</sub> multimer<sup>+</sup>CD8<sup>+</sup> T cells in BNT162b2-vaccinated individuals over time, Related to Figure 2.**

(A-C, E) Representative flow cytometry plots showing the percentages of indicated subpopulations among S<sub>269</sub> multimer<sup>+</sup>CD8<sup>+</sup> T cells.

(D, F) Flow cytometry plots showing the staining of fluorescence-minus-one (FMO) controls for Ki-67, Bcl-2, KLRG1, and CD127.

(G) Normalized MFI of CD127 (MFI of CD127 on S<sub>269</sub> multimer<sup>+</sup>CD8<sup>+</sup> T cells / MFI of CD127 on CD8<sup>+</sup>CD127<sup>-</sup> T cells) in vaccinated individuals over time summarized in box graphs. Post-first 1 week (n=8) and 3 weeks (n=12); post-second 1-2 weeks (n=10), 3 weeks (n=10), 12 weeks (n=9) and 24 weeks (n=9). Statistical analysis was performed using unpaired Mann-Whitney U test (\*\*p < 0.001, \*\*\*p < 0.0001, n.s., not significant). MFI, median fluorescence intensity.

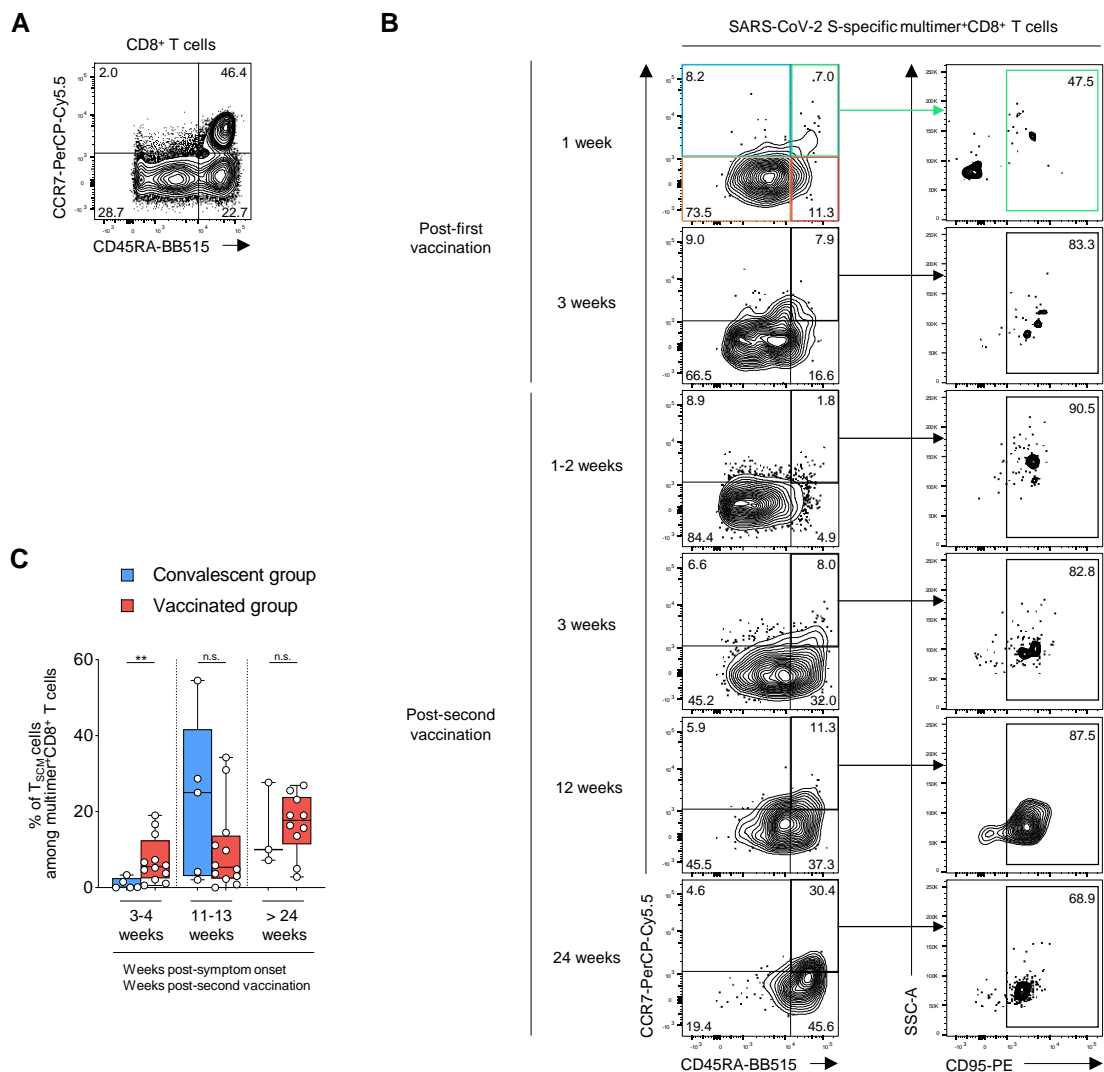

**Figure S4. Differentiation kinetics of S<sub>269</sub> multimer<sup>+</sup>CD8<sup>+</sup> T cells in BNT162b2-vaccinated individuals over time, Related to Figure 3.**

(A) Flow cytometry plots showing the expression of CCR7 and CD45RA on total CD8<sup>+</sup> T cells.

(B) Representative flow cytometry plots showing the expression of T cell differentiation markers CCR7, CD45RA, and CD95 among S<sub>269</sub> multimer<sup>+</sup>CD8<sup>+</sup> T cells.

(C) Frequency of T<sub>SCM</sub> cells among S<sub>269</sub> multimer<sup>+</sup> cells compared between convalescent and vaccinated individuals 3-4 weeks (n=5 vs. n=12), 11-13 weeks (n=5 vs. n=12), and after 24 weeks (n=3 vs. n=10) post-symptom onset or post-second vaccination. The data of convalescent individuals were retrieved from our previous study (Jung et al., 2021). Statistical analysis was performed using unpaired Mann-Whitney U test (\*\*p < 0.01, n.s., not significant).



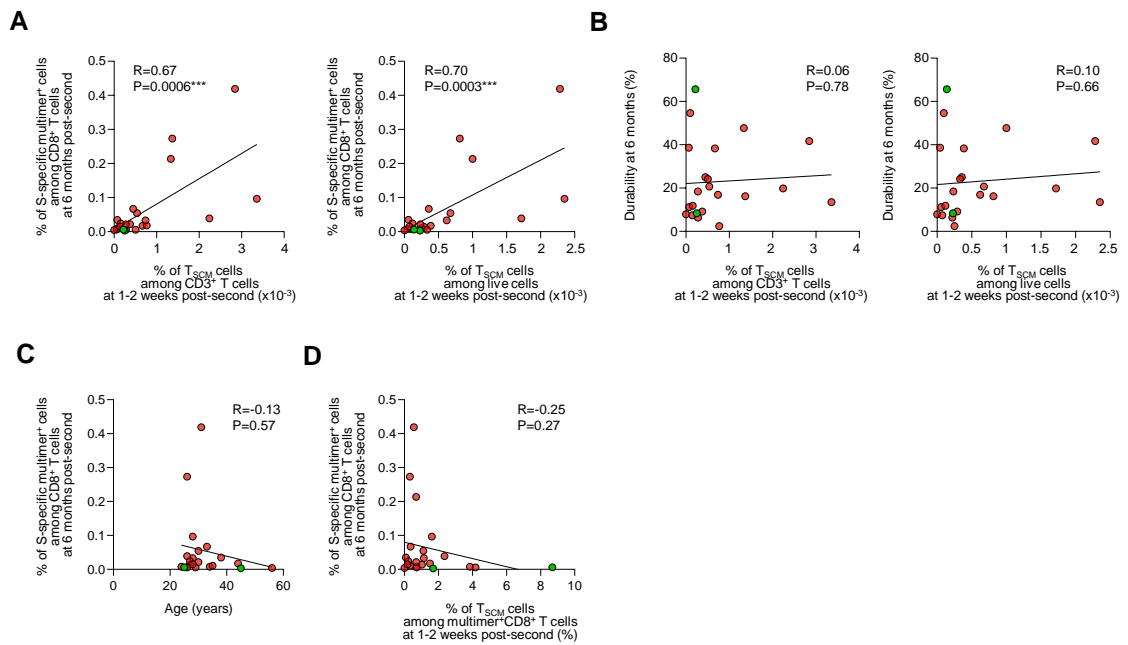

**Figure S5. Correlation between the frequency of SARS-CoV-2 S-specific MHC-I multimer<sup>+</sup>CD8<sup>+</sup> T cells, T<sub>SCM</sub> cells and age, Related to Figure 4.**

(A-B) Correlation graphs showing the relationship between the frequency of T<sub>SCM</sub> cells among CD3<sup>+</sup> T cells or live cells 1-2 weeks post-second vaccination and (A) the frequency of SARS-CoV-2 S-specific multimer<sup>+</sup>CD8<sup>+</sup> T cells 6 months post-second vaccination or (B) 6-month durability of S-specific multimer<sup>+</sup>CD8<sup>+</sup> T cells (red = S<sub>269</sub>, n=20; green = S<sub>448</sub>, n=2) with black lines representing linear regression.

(C-D) Correlation between the frequency of multimer<sup>+</sup> cells among CD8<sup>+</sup> T cells 6 months post-second vaccination and (C) donor age or (D) the percentage of T<sub>SCM</sub> cells among multimer<sup>+</sup> cells 1-2 weeks post-second vaccination (red = S<sub>269</sub>, n=20; green = S<sub>448</sub>, n=2) with black lines representing linear regression.

Statistical analysis was performed using Spearman correlation test with linear regression analysis (\*\*p < 0.001).
