# Supplementary material
Source: PubMed Central journal article supplement (PMC9263810)
Supplement: mmc2.pdf [file mmc2.pdf]

Cell Reports, Volume 40

## Supplemental information

**The generation of stem cell-like memory cells  
early after BNT162b2 vaccination is associated  
with durability of memory CD8<sup>+</sup> T cell responses**

**Sungmin Jung, Jae Hyung Jung, Ji Yun Noh, Woo-Joong Kim, Soo-Young Yoon, Jongtak Jung, Eu Suk Kim, Hong Bin Kim, Hee Jin Cheong, Woo Joo Kim, Su-Hyung Park, Kyoung-Ho Song, Joon Young Song, and Eui-Cheol Shin**
